# Supplementary material
Source: publisher figshare collection journal article supplement (https://springernature.figshare.com/ndownloader/files/17388905)
Supplement: Supplementary file 1 [file 17388905]

a


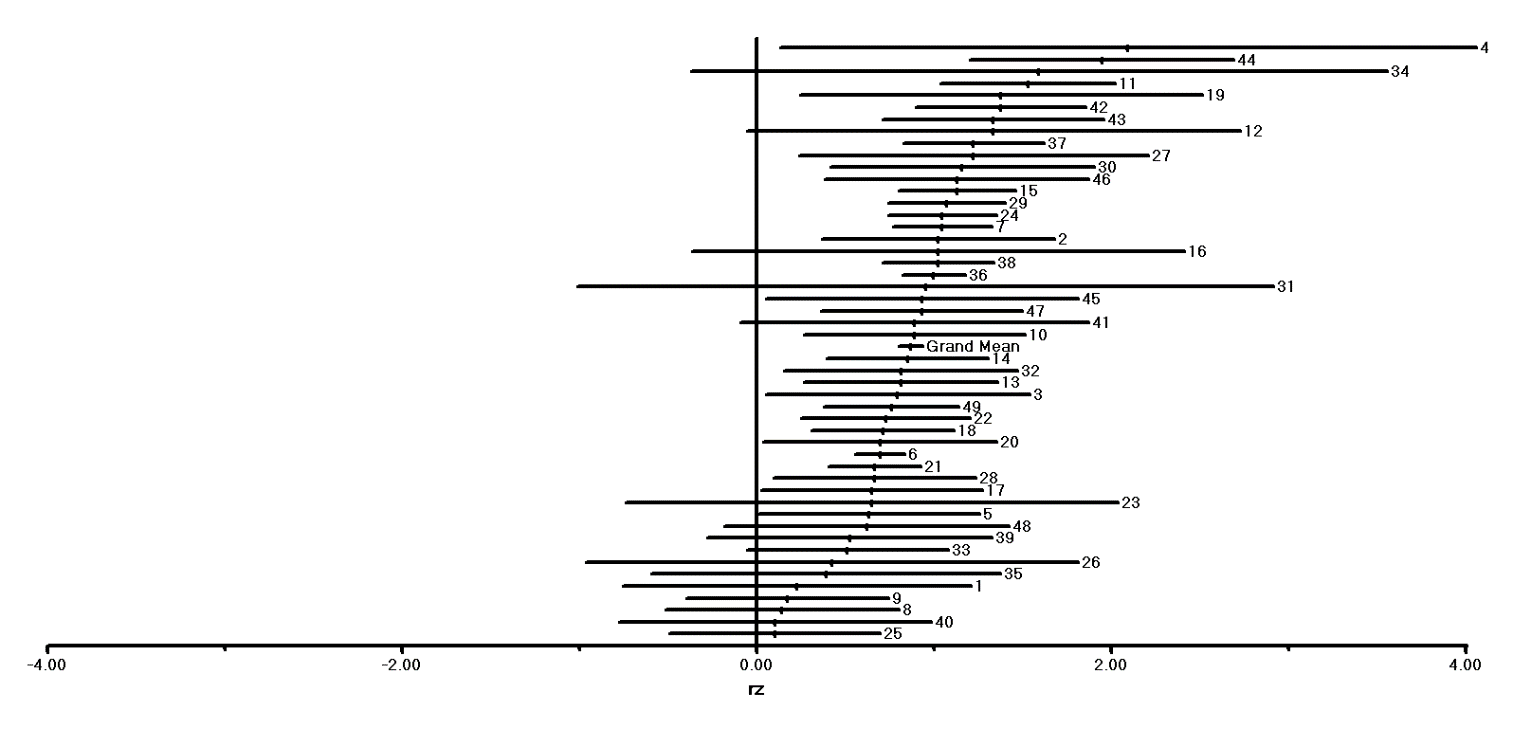


b


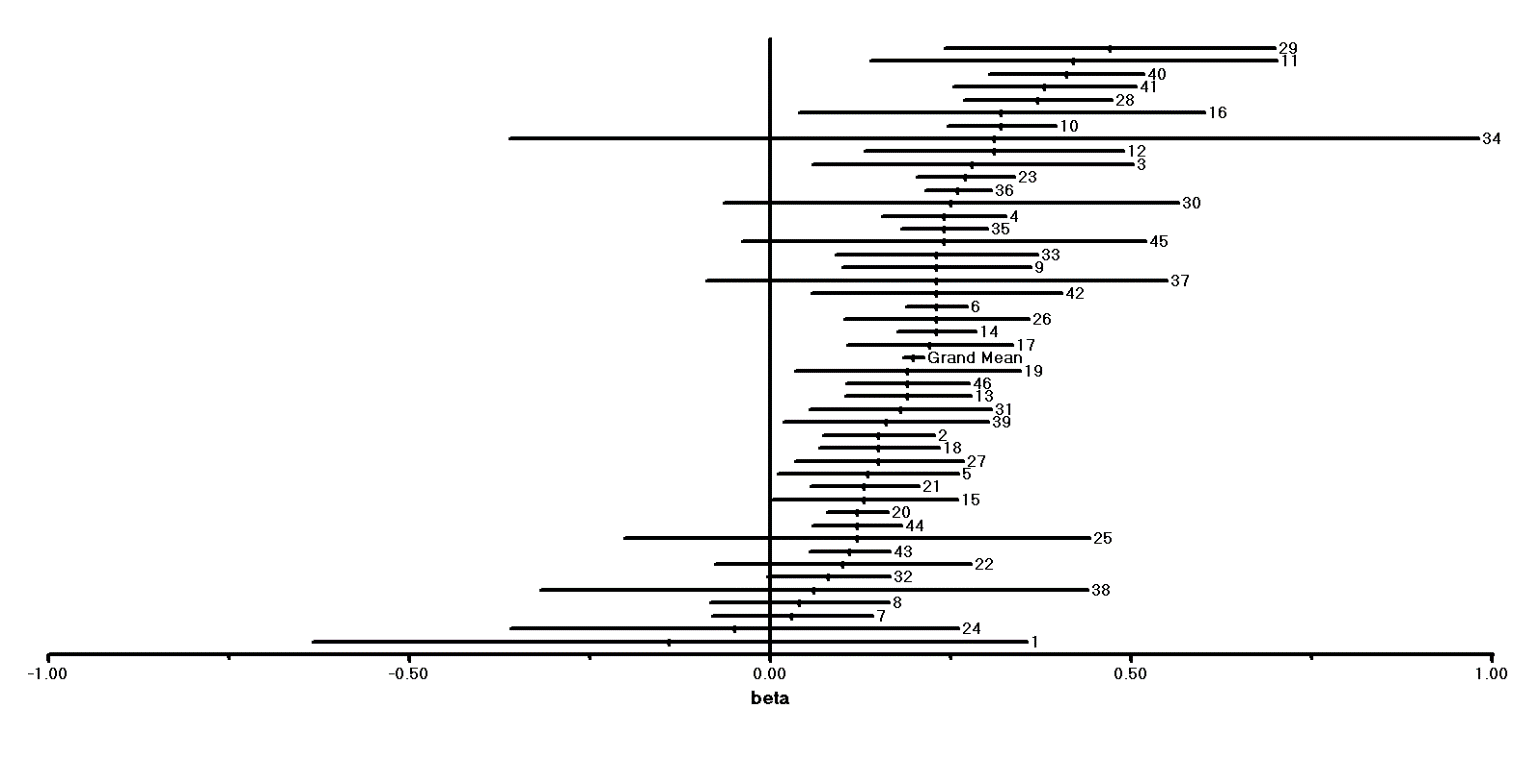


Fig. S1 Forest plot for the fit (a) and the slope value (b) of the SAR in urban green areas. Numbers indicate studies listed below. Effect sizes with confidence intervals (95%) are depicted.
